# Supplementary material
Source: PubMed Central journal article supplement (PMC2678715)
Supplement: NIHMS100461-supplement-1.pdf [file NIHMS100461-supplement-1.pdf]

## Supporting Online Material for

### **A Model of the Oxygen-Evolving Center of Photosystem II predicted by Structural Refinement based on EXAFS Simulations**

Eduardo M. Sproviero, José A. Gascón<sup>1</sup>, James P. McEvoy<sup>2</sup>,

Gary W. Brudvig, and Victor S. Batista\*

*Department of Chemistry, Yale University, New Haven, Connecticut, 06520-8107.*

Current Addresses: <sup>1</sup>*Department of Chemistry, University of Connecticut; Unit 3060, Storrs, CT 06269;* <sup>2</sup>*Department of Chemistry, Regis University, 3333 Regis Blvd., Denver, CO 80221.*

\*To Whom Correspondence Should be Addressed: [victor.batista@yale.edu](mailto:victor.batista@yale.edu);  
RECEIVED DATE (automatically inserted by publisher)

#### **This PDF file includes:**

##### **Methods and Models**

- QM/MM Structural Models.
- Spin Polarized and Spin Coupled Systems.
- Energy Evaluation.
- Protein Polarization.
- Geometry relaxation.
- Structural refinement based on polarized-EXAFS simulations.
- Computations of isotropic-EXAFS spectra.
- Computations of polarized-EXAFS spectra.
- Cartesian coordinates of the QM/MM and R-QM/MM models.

##### **Figures S1–S10.**

- R-QM/MM Model.
- QM/MM and R-QM/MM Models.
- Empirical (Polarized-EXAFS) Models.
- Polarized-EXAFS spectra based on the 1S5L and 1S5L core models.
- Polarized-EXAFS spectra based on the QM/MM and R-QM/MM models.
- Isotropic-EXAFS spectra based on the QM/MM and R-QM/MM models.
- Isotropic-EXAFS spectra based on the empirical (polarized-EXAFS) models.
- Polarized-EXAFS spectra based on the empirical (polarized-EXAFS) models.
- Polarized-EXAFS spectra for the model IIa.
- Experimental isotropic EXAFS spectra.

##### **References**

## Methods and Models:

**QM/MM Structural Model.** QM/MM molecular models were built as recently reported<sup>1,2</sup> by completion and structural refinement of the 1S5L X-ray crystal structure of PSII from *Thermosynechococcus elongatus*.<sup>3</sup> The computational models explicitly consider 1987 atoms of PSII, including the proposed  $\text{Mn}_3\text{CaO}_4\text{Mn}$  unit and all amino acid residues with  $\alpha$ -carbons within 15 Å from any atom in the OEC metal ion cluster. Geometry optimization of the complete structural model is performed in the presence of a buffer layer of amino-acid residues with  $\alpha$ -carbons, within 20–25 Å from any atom in region X, with harmonic constraints that preserve the natural shape of the system. The coordination of Mn ions is completed by hydration, assuming a minimum displacement of the ligating residues from their crystallographic positions and the usual coordination of five, or six, ligands to Mn ions with oxidation states III and IV, respectively. The variable coordination of calcium, typically with 6–8 ligands, was satisfied by the coordination of proteinaceous ligands, water molecules and negative counterions.

**Spin Polarized and Spin Coupled Systems.** The OEC metal cluster has unpaired spins, and require spin-polarized methods. These systems are also spin-coupled, including both oxomanganese complexes and metal-radical ligand interactions. The spin-coupled metal sites and/or metal-ligand radical interactions, are modeled by using spin polarized broken symmetry (BS) DFT methods.<sup>4</sup> In its current form, with recent density functional potentials and geometry optimization capability, BS-DFT is the most accurate approach available for these types of systems. BS-DFT also facilitates ligand field analysis for metal  $d \rightarrow d$ , charge transfer (ligand  $\rightarrow$  metal, metal  $\rightarrow$  ligand), and intervalence charge transfer (metal  $\rightarrow$  metal or ligand  $\rightarrow$  ligand) transitions.

**Energy Evaluation.** Under the DFT QM/MM approach, the system is partitioned into a reduced system X (including the metal cluster and ligands) and region Y that includes the rest of the system. The total energy E is obtained, as recently reported,<sup>1,2</sup> by using the two-layer ONIOM Electronic-Embedding (EE) link-hydrogen atom method as implemented in Gaussian03:<sup>5</sup>  $E = E^{MM,X+Y} + E^{QM,X} - E^{MM,X}$ , where  $E^{MM,X+Y}$  is the energy of the complete system computed at the molecular mechanics level of theory, while  $E^{QM,X}$  and  $E^{MM,X}$  correspond to the energy of the reduced-system X computed at the QM and MM levels of theory, respectively. Electrostatic interactions between regions X and Y are included in the calculation of both  $E^{QM,X}$  and  $E^{MM,X}$  at the quantum mechanical and molecular mechanics levels, respectively. Thus, the electrostatic interactions computed at the MM level in  $E^{MM,X}$  and  $E^{MM,full}$  cancel and the resulting DFT QM/MM evaluation of the total energy involves a quantum mechanical description of the polarization of the reduced system due to the electrostatic influence of the surrounding protein environment.

**Protein Polarization.** Polarization of the protein active sites induced by the distribution of charge in the QM layer is introduced by correcting the atomic charges of amino-acid residues in close contact with the QM layer, according to the self-consistent polarization protocol MoD-QM/MM.<sup>6</sup> The accuracy and capabilities of the MoD-QM/MM method have been recently demonstrated in applications to benchmark calculations of polypeptide-ligand model systems as well as in conjunction with the

Poisson-Boltzmann equation in applications to the description of protein-protein electrostatic interactions.<sup>6</sup>

**Geometry relaxation.** Relaxed DFT-QM/MM molecular structures are obtained at the ONIOM-EE (B3LYP/lacvp,6-31G(2df),6-31G:AMBER) level of theory, as recently reported.<sup>1,2,7</sup> Some of these earlier studies have also addressed the capabilities and limitations of DFT with hybrid density functionals, including the Becke-3-LeeYangParr (B3LYP), as applied to studies of biomimetic high-valent metal complexes.<sup>7</sup> The calculations combine ONIOM-EE QM/MM methodologies, implemented in Gaussian03,<sup>5</sup> with high-quality initial-guess spin-electronic states generated with Jaguar 5.5.<sup>8</sup> The combined approach exploits important capabilities of ONIOM, including both the link-hydrogen atom scheme for efficient and flexible definitions of QM layers and the possibility of modeling open-shell systems by performing Unrestricted-DFT (e.g., UB3LYP) calculations. Region Y (*i.e.*, the molecular structure beyond the QM layer) is described by the Amber MM force-field.<sup>9</sup>

**Structural refinement based on polarized-EXAFS simulation.** Refined (R)-QM/MM structural models are obtained by iteratively adjusting the molecular configuration of the cluster and directly coordinated ligands to the cluster according to a conjugate gradient optimization method, in order to minimize the mean squared deviation between the simulated and experimental polarized and isotropic EXAFS spectra. The adjustment of nuclear configurations is subject to the constraints of minimal displacements of the nuclear positions relative to the initial QM/MM configuration. The underlying computational procedure iteratively adjusts the molecular configuration of the system by conjugate gradient optimization of a scoring function defined in terms of the sum of squared deviations between calculated and experimental EXAFS spectra plus a quadratic penalty factor defined in terms of the squared deviations between the coordinates of the system and the configuration the reference DFT-QM/MM structure to ensure minimum displacements of the nuclear positions relative to a reference DFT-QM/MM structure. Upon convergence, the refined structures provide models that are maximally consistent with high-resolution polarized-EXAFS spectra and the reference QM/MM model, indicating whether the resulting refinement is within the range of error of QM/MM minimum energy configurations, or whether further improvement requires consideration of alternative ligation/protonation schemes.

**Computations of isotropic-EXAFS spectra.** Simulations of isotropic-EXAFS spectra are based on the computational protocol reported in our earlier work,<sup>1,2</sup> in accordance with previously published experimental EXAFS data.<sup>10</sup> The oscillatory part of the dipole transition matrix element (or EXAFS data  $\chi(k)$ ) is obtained by using the module *FEFF83*, explicitly considering atoms within 10 Å of any metal in the OEC (except for the spectra of models I, II, IIa and III from Ref. [11] that include only the inorganic core of the OEC, in the absence of the surrounding ligands). The energy axis is converted into the momentum ( $k$ ) space by using the transformation  $k = [2 m_e (E - E_0)]^{1/2}$  with  $E_0 = 6547$  eV. Finally, the spectra in  $k$ -space  $\chi(k)$  are multiplied by a window function  $w(k)$ , in order to reduce the so-called “side-loop effect” and Fourier-transformed considering the energy range from  $k=2.2$  Å<sup>-1</sup> to the iron *K*-edge at 7100 eV. The function  $w(k)$  is defined as a fractional cosine-squared extending over 10 eV at both  $k$ -range limits.

When comparing our isotropic-EXAFS spectra to other spectra previously reported in the literature we note that the value  $E_0 = 6547$  eV is only slightly different from the value used by Yano et al. in Ref. [11] ( $E_0 = 6543$  eV), or the value reported in Ref. [12] ( $E_0 = 6540$  eV), but significantly different from a previously reported value ( $E_0 = 6563$  eV). Also, some of the spectra previously reported (e.g., see Fig. 2 in Ref. [12]) are consistent with our isotropic-EXAFS spectra only when assuming they were generated by using  $E_0 = 6564$  eV (see Fig. S10) and Fourier transformed to the  $r$ -space by using a more reduced range (from  $k=3.5 \text{ \AA}^{-1}$  to the iron  $K$ -edge at 7100 eV). The combination of a larger  $E_0$  and a more reduced  $k$ -range gives FT-EXAFS spectra of comparable amplitudes for interactions at 1.8 and 2.7  $\text{\AA}$  (e.g., see Fig. 2 in Ref. [12]), while  $E_0 = 6547$  eV and the energy range from  $k=2.2 \text{ \AA}^{-1}$  gives FT-EXAFS spectra with more prominent amplitude for interactions at 1.8 than at 2.7  $\text{\AA}$  (e.g., see Fig. S6).

**Computations of polarized-EXAFS spectra.** Polarized EXAFS spectra of the PSII single crystal with the  $\mathbf{e}$ -vector of the X-ray beam parallel to each crystal axis,  $a$ ,  $b$ ,  $c$  were simulated by using the *ab initio* real space Green function approach, as implemented in the programs FEFF83 and IFEFFIT.<sup>13</sup> These calculations are also based on the theory of the oscillatory structure due to multiple-scattering, originally proposed by Kronig,<sup>14</sup> and worked out in detail by Sayers,<sup>15</sup> Stern,<sup>16</sup> Lee and Pendry,<sup>17</sup> and Ashley and Doniach.<sup>18</sup> The EXAFS spectra were computed along the  $a$ ,  $b$  and  $c$ -axes of the crystal for the OEC structure proposed by the XRD model 1S5L,<sup>3</sup> the empirical models proposed by Yano *et al.*,<sup>11</sup> the DFT-QM/MM model,<sup>1</sup> and the refined (R)-QM/MM model introduced in this paper.

Complete model structures suitable for simulations of polarized-EXAFS spectra along the crystal axes  $a$ ,  $b$  and  $c$  of PSII were built by considering that PSII from *Thermosynechococcus elongatus* crystallizes as a homodimer (the two monomers are related by a non-crystallographic local  $C_2$  axis) in the orthorhombic space group  $P2_12_12_1$  with four symmetry-related dimers per unit cell. Therefore, the OEC models were positioned with the coordinates of one of the monomers and the coordinates of the companion monomer were calculated by using the local  $C_2$  symmetry operation for the dimeric PSII. The constructed dimer was then replicated into the four symmetry related units within the orthorhombic  $P2_12_12_1$  crystal unit cell. The FEFF8 calculations were performed with Debye-Waller parameters of  $0.002 \text{ \AA}^{-2}$ . The energy axis was converted into the momentum ( $k$ ) space by using  $E_0 = 6543.3$  eV. A window function  $w(k)$ , defined as a fractional cosine-square window (Hanning) with  $\Delta k=1$ , was applied to the  $k^3$ -weighted EXAFS data. The windowed spectra obtained in for a grid of  $k$ -points, equally spaced at  $0.05 \text{ \AA}^{-1}$  in the  $3.5\text{--}11.5 \text{ \AA}^{-1}$   $k$ -range, were Fourier transformed (FT) to obtain the FT-amplitudes in the reduced ( $r$ ) distance  $r$ -space.

***DFT-QM/MM Model: Cartesian coordinates of the OEC of PSII.***

|    |           |           |           |
|----|-----------|-----------|-----------|
| Mn | 27.717201 | 40.342304 | 70.656358 |
| Mn | 27.142389 | 39.521068 | 68.089129 |
| Mn | 29.231035 | 38.321432 | 69.549189 |
| Mn | 29.466173 | 38.670560 | 65.848459 |
| O  | 27.584893 | 41.034847 | 69.032454 |
| O  | 27.429768 | 38.708904 | 69.711816 |
| O  | 29.445697 | 39.848942 | 70.547257 |
| O  | 28.961550 | 39.502440 | 67.394840 |
| Ca | 29.427294 | 41.909503 | 67.917499 |
| H  | 30.365816 | 37.947160 | 62.212286 |
| C  | 29.891536 | 37.094393 | 63.100241 |
| O  | 29.580412 | 35.930840 | 62.844780 |
| O  | 29.665649 | 37.651986 | 64.325323 |
| H  | 24.732742 | 42.337094 | 66.278449 |
| C  | 25.385650 | 41.667956 | 67.201167 |
| O  | 25.008980 | 41.773996 | 68.387357 |
| O  | 26.346336 | 40.811393 | 66.771944 |
| H  | 22.011116 | 37.717593 | 67.141946 |
| C  | 23.066474 | 38.122596 | 67.777363 |
| N  | 23.184928 | 38.137818 | 69.168230 |
| C  | 24.265253 | 38.574926 | 67.305740 |
| C  | 24.411324 | 38.617236 | 69.495166 |
| N  | 25.080519 | 38.914100 | 68.386938 |
| H  | 22.426558 | 38.017171 | 69.842318 |
| H  | 24.634350 | 38.642319 | 66.305651 |
| H  | 24.756419 | 38.751940 | 70.498524 |
| H  | 26.786236 | 35.426777 | 67.635523 |
| C  | 27.413521 | 36.579073 | 67.771303 |
| O  | 28.483573 | 36.589198 | 68.529912 |
| O  | 26.976762 | 37.617392 | 67.173005 |
| H  | 26.471974 | 42.530728 | 73.143284 |
| C  | 27.092433 | 42.769531 | 72.004788 |
| O  | 26.937811 | 43.784334 | 71.338218 |
| O  | 28.063086 | 41.821961 | 71.649935 |
| H  | 32.231356 | 43.981411 | 70.647550 |
| C  | 30.941345 | 44.006928 | 70.339933 |
| O  | 30.341564 | 43.104372 | 69.672024 |
| O  | 30.260000 | 45.004708 | 70.784014 |
| H  | 31.158048 | 35.353672 | 71.652620 |
| C  | 30.202990 | 35.781592 | 70.870228 |
| O  | 29.593574 | 36.860560 | 71.118267 |
| O  | 29.975561 | 35.037872 | 69.793299 |
| O  | 31.206515 | 40.013004 | 65.356878 |
| H  | 30.786318 | 40.936532 | 65.075310 |

|   |           |           |           |
|---|-----------|-----------|-----------|
| H | 31.847304 | 39.738117 | 64.635511 |
| O | 30.832207 | 37.669231 | 66.766055 |
| H | 31.071539 | 37.938878 | 67.894601 |
| H | 30.767817 | 36.638690 | 66.760598 |
| O | 31.087397 | 38.120739 | 69.121142 |
| H | 31.746420 | 38.799206 | 69.486289 |
| O | 25.759352 | 40.848589 | 70.638735 |
| H | 25.422445 | 41.239819 | 69.729917 |
| H | 24.973204 | 40.636480 | 71.248819 |
| O | 27.423305 | 39.256188 | 72.379436 |
| H | 27.003164 | 38.339305 | 72.234103 |
| H | 28.173367 | 39.167865 | 73.028742 |
| O | 31.726858 | 41.095196 | 67.799121 |
| H | 32.029797 | 42.046116 | 67.538412 |
| H | 31.812109 | 40.582636 | 66.911208 |
| O | 27.894536 | 39.612247 | 65.021083 |
| H | 27.907973 | 39.920706 | 64.064328 |
| H | 29.251822 | 35.517565 | 69.196120 |

***R-QM/MM Model: Cartesian coordinates of the OEC of PSII.***

|    |           |           |           |
|----|-----------|-----------|-----------|
| Mn | 27.719096 | 40.324994 | 70.662066 |
| Mn | 27.154848 | 39.577530 | 68.085572 |
| Mn | 29.241875 | 38.497888 | 69.545791 |
| Mn | 29.411008 | 38.504533 | 65.872080 |
| O  | 27.570362 | 41.102889 | 69.040704 |
| O  | 27.397014 | 38.667891 | 69.650279 |
| O  | 29.507074 | 39.670086 | 70.538617 |
| O  | 29.077257 | 39.468969 | 67.374663 |
| Ca | 29.327465 | 42.045220 | 67.977228 |
| H  | 30.834880 | 38.232688 | 62.314986 |
| C  | 30.343478 | 37.341516 | 63.154604 |
| O  | 30.088857 | 36.174856 | 62.854639 |
| O  | 30.030752 | 37.859322 | 64.378057 |
| H  | 24.725863 | 41.603032 | 65.923863 |
| C  | 25.402778 | 41.071717 | 66.916301 |
| O  | 24.968091 | 41.223206 | 68.077452 |
| O  | 26.460917 | 40.289280 | 66.586161 |
| H  | 22.124428 | 37.796467 | 66.728347 |
| C  | 23.144902 | 38.179513 | 67.430825 |
| N  | 23.187586 | 38.156898 | 68.825972 |
| C  | 24.368929 | 38.638910 | 67.037362 |
| C  | 24.395846 | 38.621832 | 69.231832 |
| N  | 25.125221 | 38.945282 | 68.169989 |
| H  | 22.393316 | 38.021644 | 69.454395 |
| H  | 24.792073 | 38.731429 | 66.060970 |
| H  | 24.686275 | 38.728022 | 70.255716 |
| H  | 26.858621 | 35.696415 | 67.380506 |

|   |           |           |           |
|---|-----------|-----------|-----------|
| C | 27.498420 | 36.824865 | 67.619193 |
| O | 28.516539 | 36.769516 | 68.444403 |
| O | 27.122425 | 37.903538 | 67.051812 |
| H | 26.321294 | 42.541761 | 73.116212 |
| C | 27.006318 | 42.792246 | 72.017953 |
| O | 26.907458 | 43.824240 | 71.367367 |
| O | 27.975833 | 41.832647 | 71.693630 |
| H | 31.900100 | 44.221351 | 70.857320 |
| C | 30.628991 | 44.168401 | 70.481976 |
| O | 30.123595 | 43.236274 | 69.777590 |
| O | 29.863306 | 45.116900 | 70.895600 |
| H | 30.845643 | 35.160938 | 71.764961 |
| C | 29.947737 | 35.627207 | 70.938074 |
| O | 29.367636 | 36.727615 | 71.160944 |
| O | 29.746759 | 34.896152 | 69.847299 |
| O | 31.355377 | 39.581327 | 65.508014 |
| H | 31.092878 | 40.563970 | 65.235517 |
| H | 31.985203 | 39.230442 | 64.810344 |
| O | 30.929183 | 38.060317 | 66.599120 |
| H | 31.089894 | 38.163057 | 67.768402 |
| H | 30.824564 | 37.044441 | 66.446662 |
| O | 31.085150 | 38.085371 | 69.233303 |
| H | 31.728106 | 38.752814 | 69.644507 |
| O | 25.633962 | 40.805795 | 70.482593 |
| H | 25.342619 | 41.212759 | 69.564980 |
| H | 24.818270 | 40.575544 | 71.045491 |
| O | 27.244482 | 39.211352 | 72.321716 |
| H | 26.812014 | 38.305783 | 72.144986 |
| H | 27.958120 | 39.099495 | 73.007429 |
| O | 31.787764 | 41.267155 | 68.018372 |
| H | 32.073653 | 42.234482 | 67.802649 |
| H | 31.938312 | 40.784939 | 67.122169 |
| O | 28.096341 | 39.502426 | 65.037021 |
| H | 28.157400 | 39.799905 | 64.078642 |
| H | 29.072384 | 35.404811 | 69.217211 |

**Table S1.** Interatomic distances in the R-QM/MM model of the OEC of PSII, using the atomic labels indicated in Fig. S1.

| Atom Pair | Distances [ $\text{\AA}$ ] |
|-----------|----------------------------|
| 1-2       | 2.74                       |
| 1-3       | 2.63                       |
| 1-5       | 1.80                       |
| 1-6       | 1.97                       |
| 1-7       | 1.91                       |
| 1-34      | 1.84                       |
| 1-51      | 2.14                       |
| 1-54      | 2.05                       |
| 2-3       | 2.77                       |
| 2-4       | 3.34                       |
| 2-5       | 1.85                       |
| 2-6       | 1.83                       |
| 2-8       | 2.05                       |
| 2-9       | 3.29                       |
| 2-17      | 1.80                       |
| 2-23      | 2.13                       |
| 2-30      | 1.97                       |
| 3-4       | 3.68                       |
| 3-6       | 1.86                       |
| 3-7       | 1.56                       |
| 3-8       | 2.38                       |
| 3-9       | 3.88                       |
| 3-29      | 2.17                       |
| 3-41      | 2.40                       |
| 3-49      | 1.91                       |
| 4-8       | 1.82                       |
| 4-13      | 1.74                       |
| 4-43      | 2.25                       |
| 4-46      | 1.74                       |
| 4-60      | 1.85                       |



**Figures:**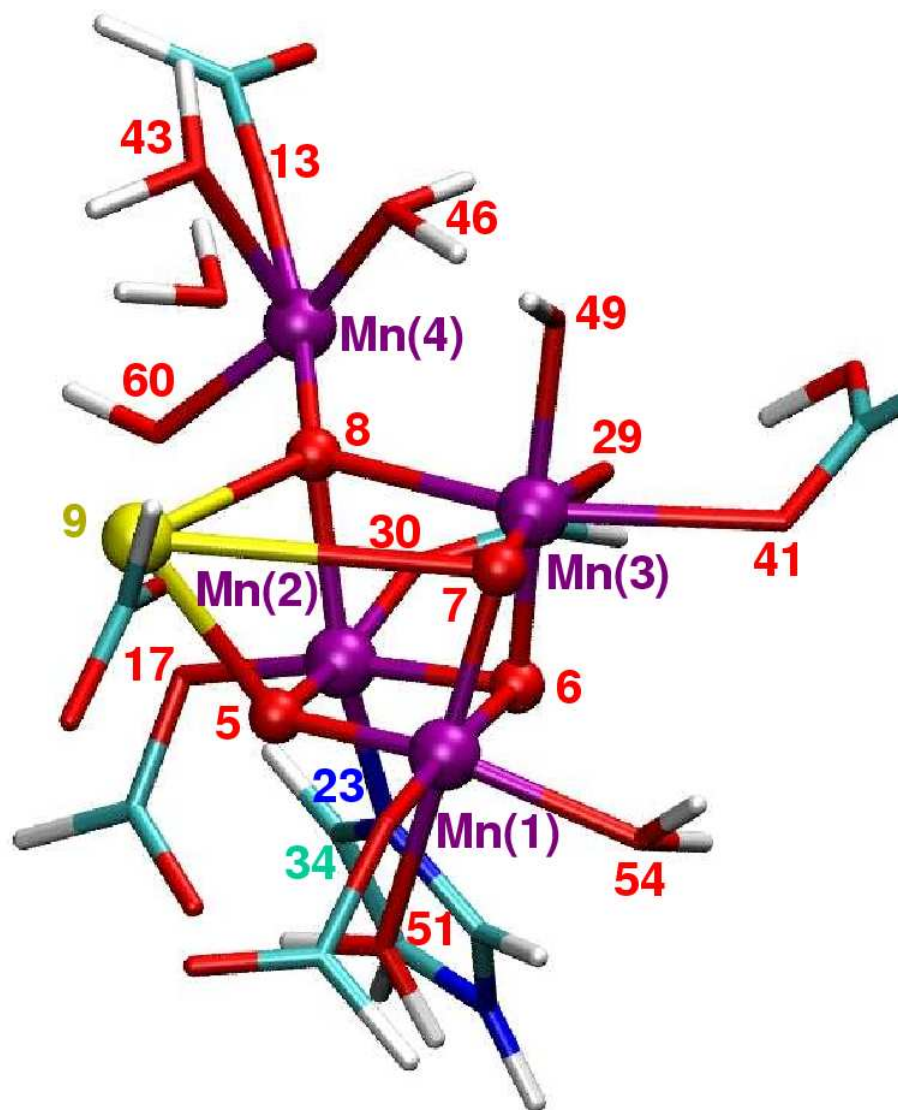

**Figure S1:** R-QM/MM model of the OEC of PSII including only the centers that are most relevant to calculations of EXAFS spectra.

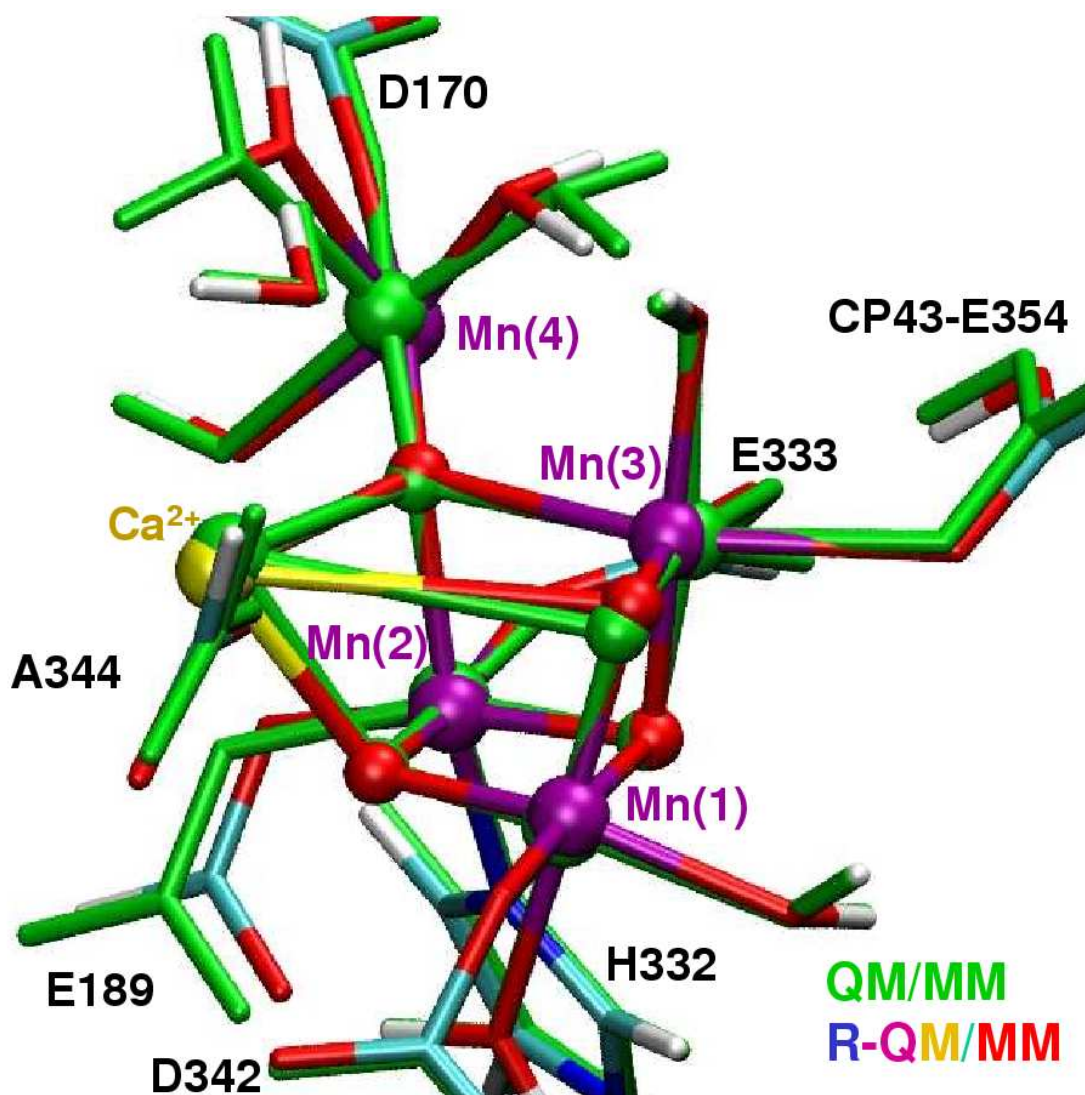

**Figure S2:** Superposition of the DFT-QM/MM model (green)<sup>1,2</sup> and the R-QM/MM (color) model of the OEC of PSII introduced in this paper.

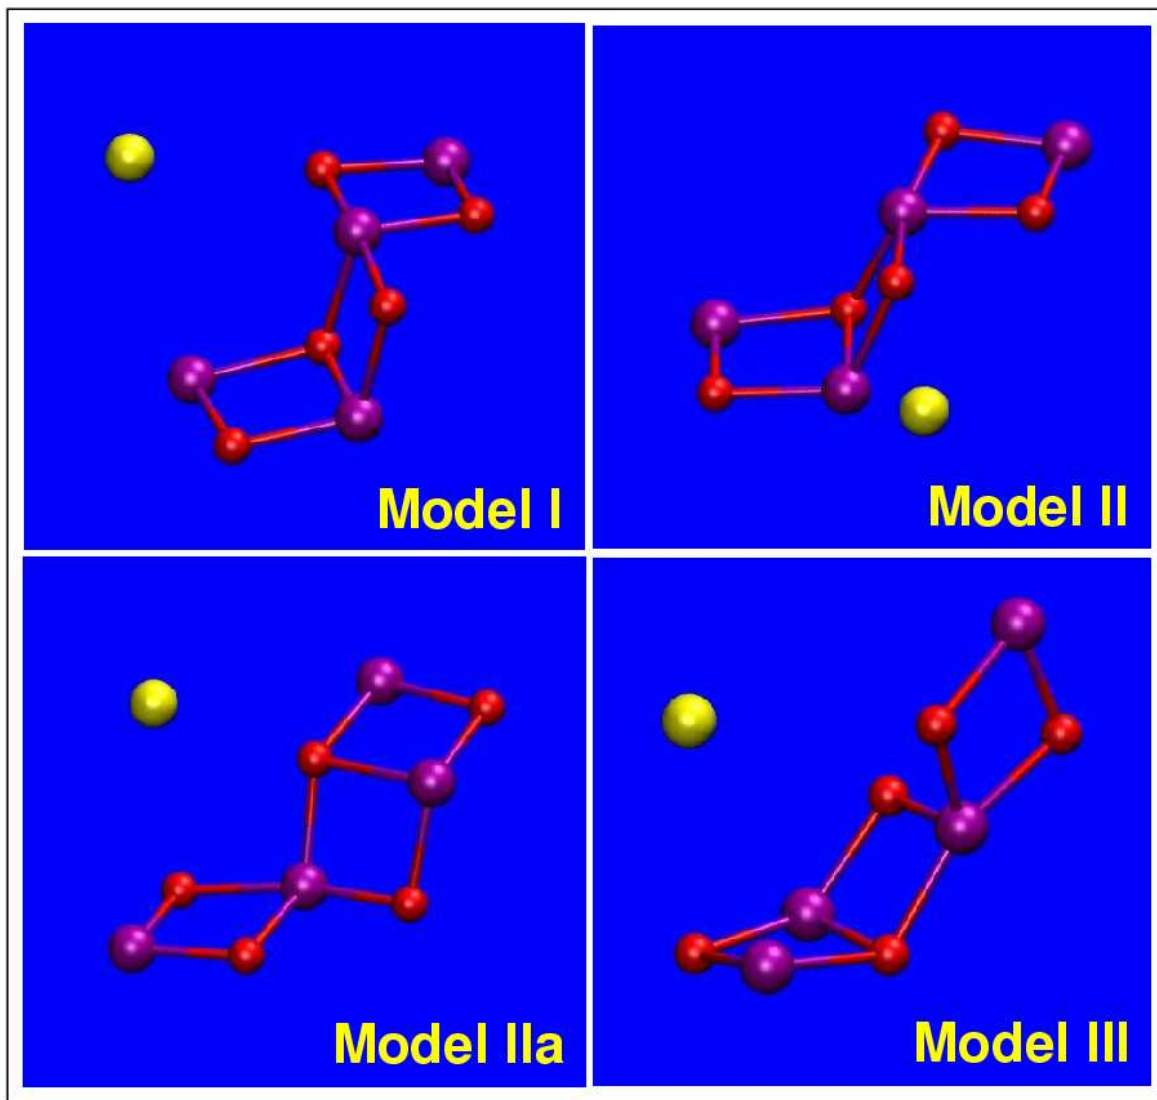

**Figure S3:** Empirical models of the OEC of PSII proposed by Yano et al.<sup>11</sup>

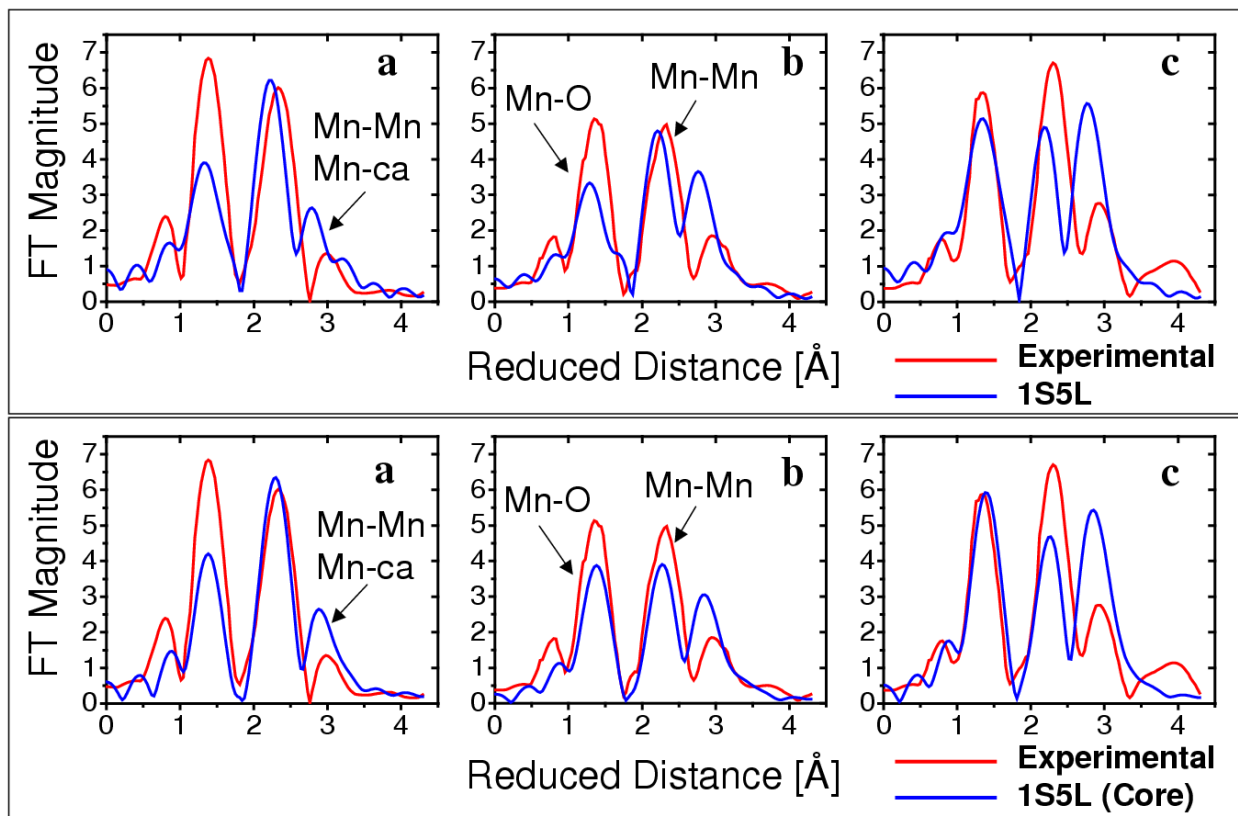

**Figure S4:** Comparison of the polarized-EXAFS spectra (red),<sup>11</sup> along the crystal axes *a*, *b* and *c*, and the corresponding spectra calculated, as described in the text, by using the coordinates of the XRD model 1S5L (blue).<sup>3</sup> Top and bottom panels compare the calculated spectra obtained by including (top), or neglecting (bottom), the contributions of scattering paths from the proteinaceous ligands. The deviations between calculated and experimental spectra suggest inaccuracies in distances/orientations of metal-metal, or metal-ligand vectors in the 1S5L model. In addition, the calculated EXAFS spectra (blue lines) are similar for the complete 1S5L model (top) and the 1S5L core in the absence of proteinaceous ligands (bottom), indicating that the predominant contributions to the spectra indeed result from scattering paths of the inorganic core, including scattering paths from the metal centers and oxo bridges in the  $\text{Mn}_3\text{CaO}_4\text{Mn}$  unit. At the same time, these results indicate that electron scattering paths from the ligands also introduce significant contributions to the spectra since the blue lines in the top and bottom panels are slightly different (compare overall amplitudes of the first and second peaks in top and bottom panels). Therefore, realistic simulations of EXAFS spectra of the OEC of PSII must include a complete and reliable description of the ligands coordinated to the metal cluster.

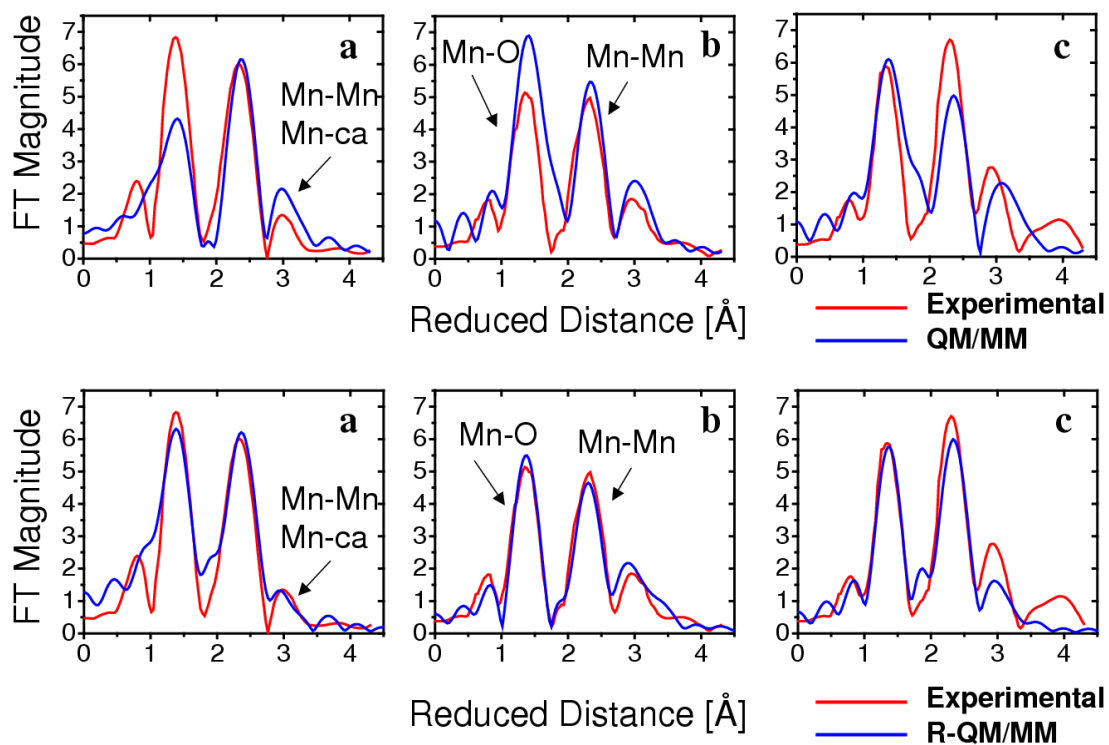

**Figure S5:** Comparison between polarized-EXAFS spectra (red)<sup>11</sup> of the OEC of PSII, along the crystal unit cell axes *a*, *b* and *c*, and the corresponding spectra calculated as described in the text (blue) by using the coordinates of the QM/MM<sup>1,2</sup> and R-QM/MM (this paper). These results show that the R-QM/MM model adequately describes the polarized-EXAFS experimental data.

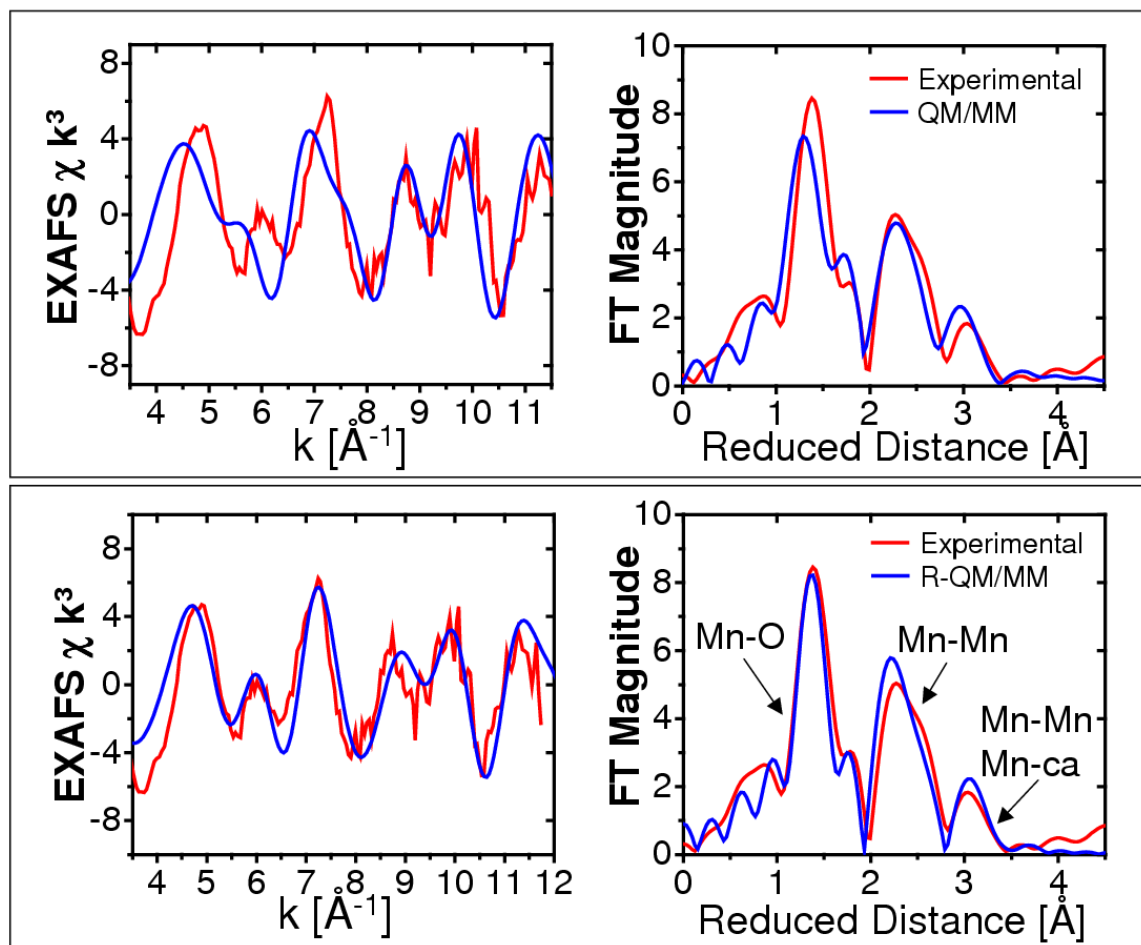

**Figure S6:** Comparison of the experimental isotropic EXAFS spectrum<sup>10</sup> and FT EXAFS Magnitude<sup>10</sup> (red) and the calculated spectra (blue) obtained with the QM/MM (top)<sup>1,2</sup> and R-QM/MM (bottom) models. These results show that the R-QM/MM structure reproduces the isotropic EXAFS experimental data, in addition to reproducing the polarized-EXAFS amplitudes along the crystal axes *a*, *b* and *c* (see Fig. S5).

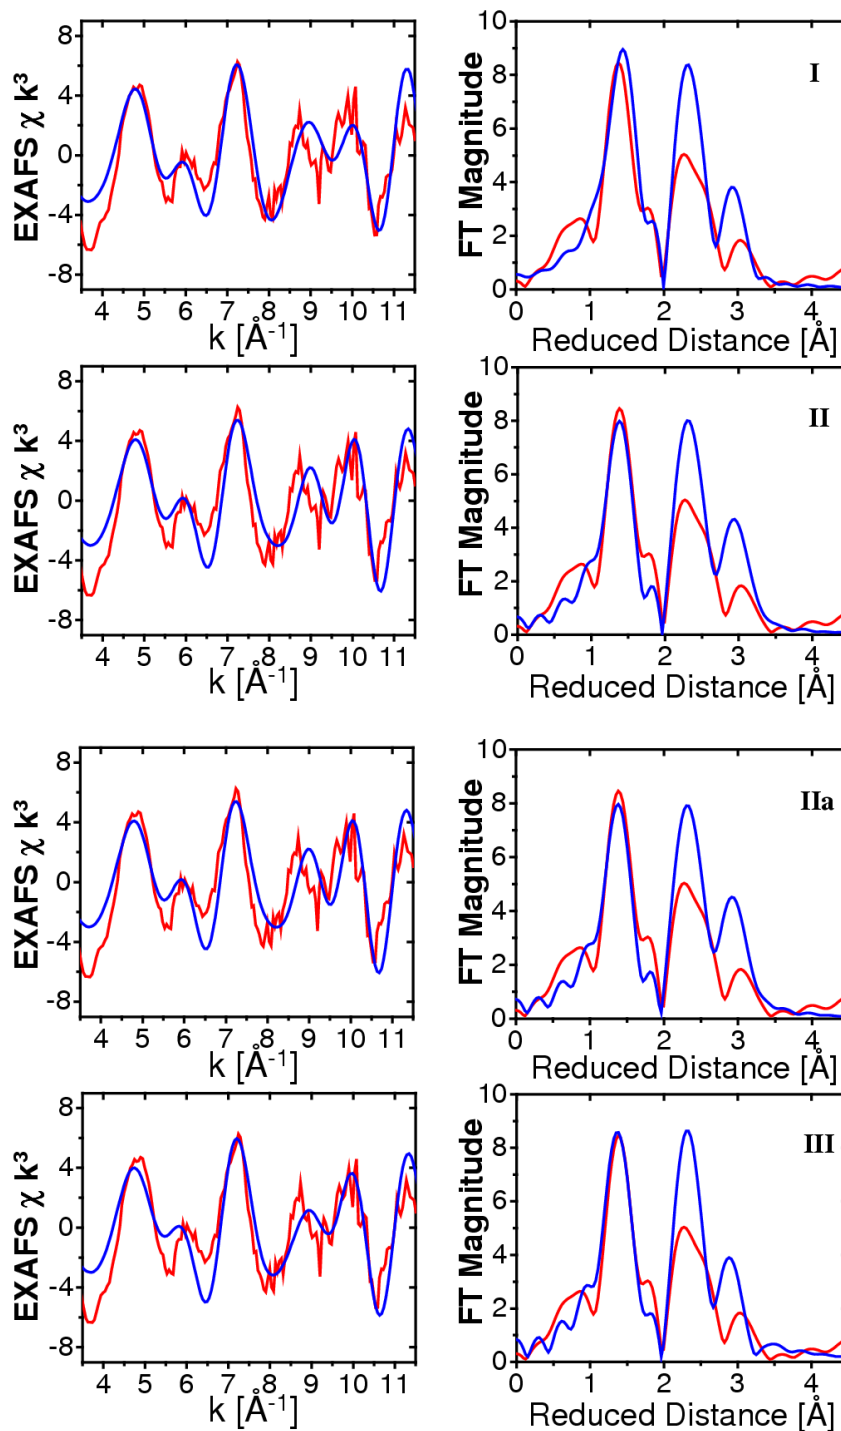

**Figure S7:** Isotropic EXAFS data (red)<sup>10</sup> compared to the calculated spectra (blue) obtained by using the four empirical models of the inorganic core proposed by Yano *et al.*<sup>11</sup> These results indicate that the models I, II, IIa and III adequately describe the positions of the first and second peaks, although the relative heights of the peaks are not properly described. Furthermore, the third peak is predicted to be at slightly shorter distances, according to the simulation protocol implemented in this paper.



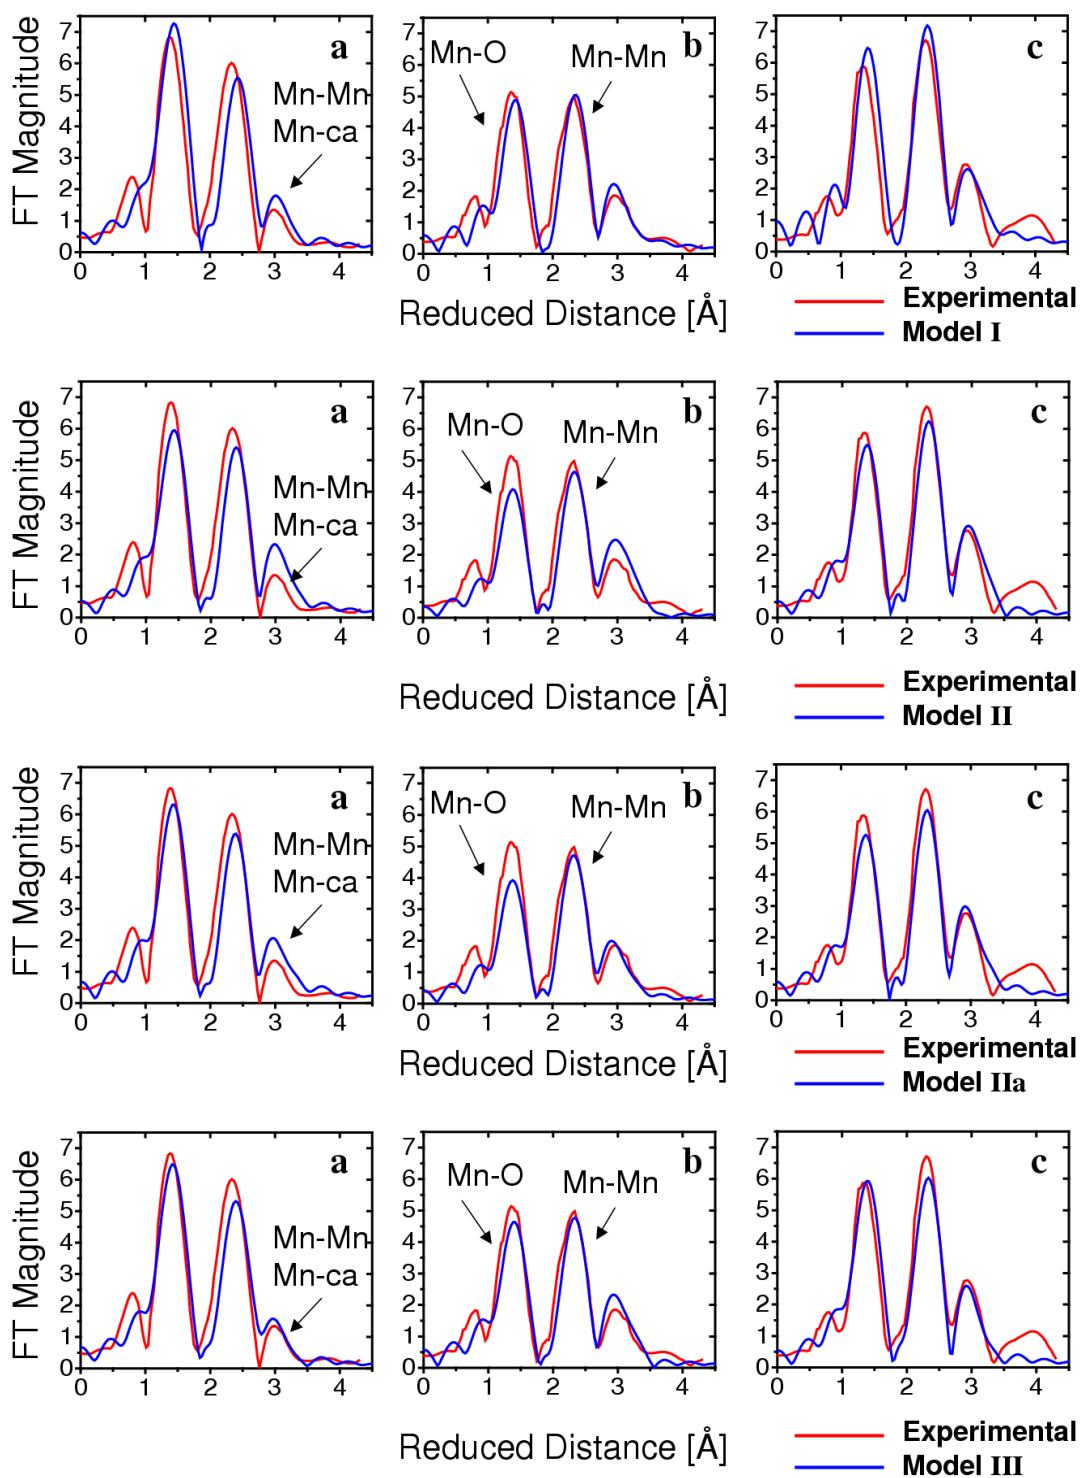

**Figure S8:** Comparison between the experimental polarized EXAFS spectra (red),<sup>11</sup> along the crystal unit cell axes *a*, *b* and *c*, and the corresponding spectra calculated as described in the text (blue) by using the coordinates of the four empirical models proposed by Yano *et al.*<sup>11</sup> These results show that the four models adequately describe the polarized-EXAFS spectra.



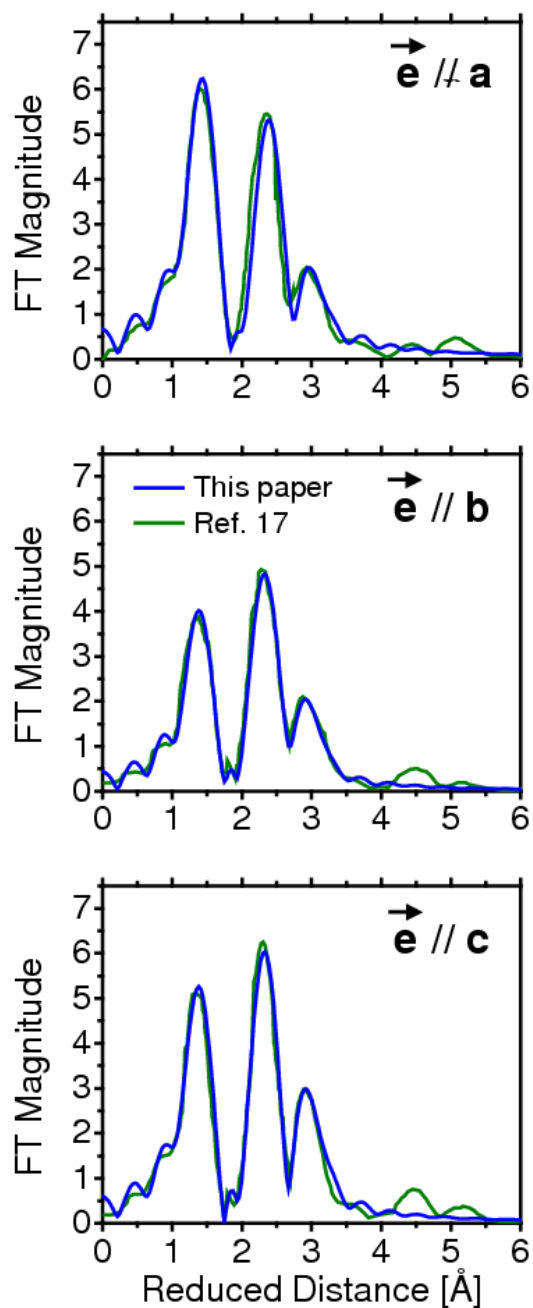

**Figure S9:** Comparison of the calculated polarized-EXAFS spectra reported in Ref. [11] (green lines) for model IIa, along the crystal axes *a*, *b* and *c*, and the corresponding spectra calculated as described in the text (blue lines). These results indicate that the computational protocol implemented in our studies reproduces the calculations reported in Ref [11].

(a)

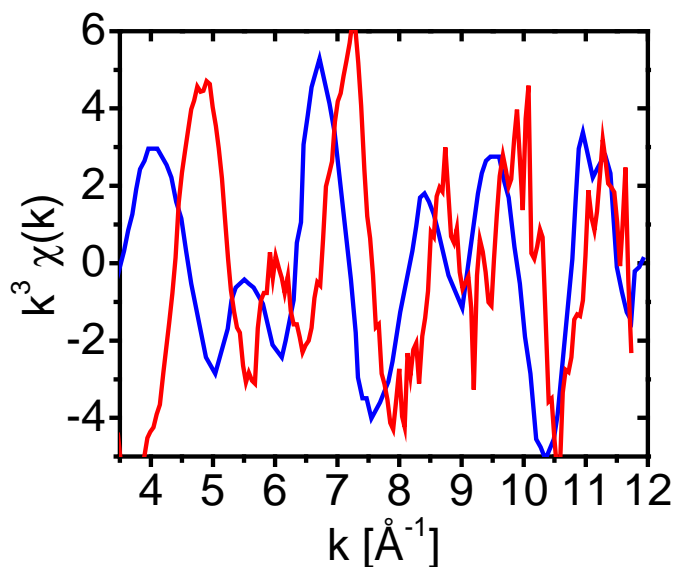

(b)

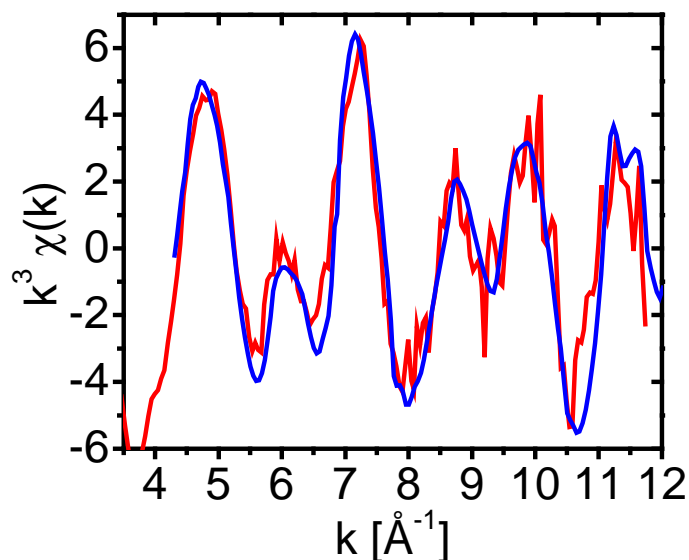

**Figure S10:** (a) Comparison of isotropic-EXAFS spectra reported in Ref. [12] (blue), and the corresponding experimental data, used in our computational studies, obtained Dau and co-workers.<sup>10</sup> (b) Same comparison presented in (a) but after transforming the data  $\chi(k)$  from Ref. [12] into  $\chi(E)$ , using the transformation  $E=E_0+k^2/(2 m_e)$  with  $E_0=6564$  eV and subsequently transforming the resulting spectra back to  $k$ -space using  $E_0=6547$  eV. These results suggest that the spectra reported in Ref. [12] (Fig. 2) are consistent with our isotropic-EXAFS spectra only when assuming they were generated by using  $E_0 = 6564$  eV.

**References:**

- <sup>1</sup> E. M. Sproviero, J. A. Gascon, J. P. McEvoy, G. W. Brudvig, and V. S. Batista, *J. Chem. Theor. Comput.* **2**, 1119 (2006).
- <sup>2</sup> E. M. Sproviero, J. A. Gascon, J. P. McEvoy, G. W. Brudvig, and V. S. Batista, *Curr. Op. Struct. Biol.* **17**, 173 (2007); E. M. Sproviero, J. A. Gascon, J. P. McEvoy, G. W. Brudvig, and V. S. Batista, *J. Am. Chem. Soc.* **130**, 3428 (2008); E. M. Sproviero, K. Shinopoulos, J. A. Gascon, J. P. McEvoy, G. W. Brudvig, and V. S. Batista, *Phil. Trans. Royal Soc. London Series B - Biol. Sci.* **363**, 1149 (2008); E. M. Sproviero, J. A. Gascon, J. P. McEvoy, G. W. Brudvig, and V. S. Batista, *Coord. Chem. Rev.* **252**, 395 (2008).
- <sup>3</sup> K. N. Ferreira, T. M. Iverson, K. Maghlaoui, J. Barber, and S. Iwata, *Science* **303** (5665), 1831 (2004).
- <sup>4</sup> L. Noodleman, *J. Chem. Phys.* **74**, 5737 (1981); L. Noodleman and E. R. Davidson, *Chem. Phys.* **109**, 131 (1986); L. Noodleman and D. A. Case, *Adv. Inorg. Chem.* **38**, 423 (1992); L. Noodleman, C. Y. Peng, D. A. Case, and J. M. Mouesca, *Coord. Chem. Rev.* **144**, 199 (1995).
- <sup>5</sup> M. J. Frisch, G. W. Trucks, H. B. Schlegel, G. E. Scuseria, M. A. Robb, J. R. Cheeseman, J. A. M. Jr., T. Vreven, K. N. Kudin, J. C. Burant, J. M. Millam, S. S. Iyengar, J. Tomasi, V. Barone, B. Mennucci, M. Cossi, G. Scalmani, N. Rega, G. A. Petersson, H. Nakatsuji, M. Hada, M. Ehara, K. Toyota, R. Fukuda, J. Hasegawa, M. Ishida, T. Nakajima, Y. Honda, O. Kitao, H. Nakai, M. Klene, X. Li, J. E. Knox, H. P. Hratchian, J. B. Cross, C. Adamo, J. Jaramillo, R. Gomperts, R. E. Stratmann, O. Yazyev, A. J. Austin, R. Cammi, C. Pomelli, J. W. Ochterski, P. Y. Ayala, K. Morokuma, G. A. Voth, P. Salvador, J. J. Dannenberg, V. G. Zakrzewski, S. Dapprich, A. D. Daniels, M. C. Strain, O. Farkas, D. K. Malick, A. D. Rabuck, K. Raghavachari, J. B. Foresman, J. V. Ortiz, Q. Cui, A. G. Baboul, S. Clifford, J. Cioslowski, B. B. Stefanov, G. Liu, A. Liashenko, P. Piskorz, I. Komaromi, R. L. Martin, D. J. Fox, T. Keith, M. A. Al-Laham, C. Y. Peng, A. Nanayakkara, M. Challacombe, P. M. W. Gill, B. Johnson, W. Chen, M. W. Wong, C. Gonzalez, and J. A. Pople, (2003).
- <sup>6</sup> J. A. Gascon, S. S. F. Leung, E. R. Batista, and V. S. Batista, *J. Chem. Theory Comput.* **2** (1), 175 (2006).
- <sup>7</sup> E. M. Sproviero, J. A. Gascon, J. P. McEvoy, G. W. Brudvig, and V. S. Batista, *J. Inorg. Biochem.* **100**, 786 (2006).
- <sup>8</sup> L. L. C. Jaguar 5.5. Schroedinger, Portland, OR., (1991-2003).
- <sup>9</sup> W. D. Cornell, P. Cieplak, C. I. Bayly, I. R. Gould, K. M. Merz, D. M. Ferguson, D. C. Spellmeyer, T. Fox, J. W. Caldwell, and P. A. Kollman, *J. Am. Chem. Soc.* **117** (19), 5179 (1995); W. D. Cornell, P. Cieplak, C. I. Bayly, I. R. Gould, K. M. Merz, D. M. Ferguson, D. C. Spellmeyer, T. Fox, J. W. Caldwell, and P. A. Kollman, *J. Am. Chem. Soc.* **118** (9), 2309 (1996).
- <sup>10</sup> M. Haumann, C. Muller, P. Liebisch, L. Iuzzolino, J. Dittmer, M. Grabolle, T. Neisius, W. Meyer-Klaucke, and H. Dau, *Biochemistry* **44** (6), 1894 (2005); H. Dau, P. Liebisch, and M. Haumann, *Phys. Chem. Chem. Phys.* **6** (20), 4781 (2004).
- <sup>11</sup> J. Yano, J. Kern, K. Sauer, M. J. Latimer, Y. Pushkar, J. Biesiadka, B. Loll, W. Saenger, J. Messinger, A. Zouni, and V. K. Yachandra, *Science* **314**, 821 (2006).
- <sup>12</sup> J. Yano, Y. Pushkar, P. Glatzel, A. Lewis, K. Sauer, J. Messinger, U. Bergmann, and V. K. Yachandra, *J. Am. Chem. Soc.* **127**, 14974 (2005).
- <sup>13</sup> A. L. Ankudinov, C. E. Bouldin, J. J. Rehr, J. Sims, and H. Hung, *Physical Review B* **65** (10) (2002); C. Bouldin, J. Sims, H. Hung, J. J. Rehr, and A. L. Ankudinov, *X-Ray Spectrometry* **30** (6), 431 (2001).

- <sup>14</sup> R. D. Kronig, Proceedings of the Royal Society of London Series a-Containing Papers of a Mathematical and Physical Character **133** (821), 255 (1931); R. D. Kronig and W. G. Penney, Proceedings of the Royal Society of London Series a-Containing Papers of a Mathematical and Physical Character **130** (814), 499 (1931).
- <sup>15</sup> D. E. Sayers, E. A. Stern, and F. W. Lytle, Phys. Rev. Lett. **27** (18), 1204 (1971).
- <sup>16</sup> E. A. Stern, Phys. Rev. B **10** (8), 3027 (1974).
- <sup>17</sup> P. A. Lee and J. B. Pendry, Phys. Rev. B **11** (8), 2795 (1975).
- <sup>18</sup> C. A. Ashley and S. Doniach, Physical Review B **11** (4), 1279 (1975).
